# Supplementary material for: DNA barcoding unveils skate (Chondrichthyes: Rajidae) species diversity in ‘ray’ products sold across Ireland and the UK
Source: PeerJ. 2013 Aug 13;1:e129. doi: 10.7717/peerj.129 (PMC3746960; doi:10.7717/peerj.129)
Supplement: Supplemental Information 1 [file peerj-01-129-s001.xlsx]

## Sheet: Sheet1
Supplementary Material 1. Details of the samples collected (location and date of purchase), length of DNA barcode amplified, BOLD sample ID and the results of searches on BOLD and GeneBank online databases.
Sample	Retailer Abbreviation	City/Town	Country	Date	COI length (base pairs)	BOLD sample ID	Closest match in full species level BOLD database	% match	matches <2% divergence (BOLD published database)	Genbank	%match	matches <2% divergence
AG05*	Retailer1	Greater Manchester	UK	09.11.12	645	AG05_F2	Raja montagui	100	Raja polystigma 98.25	Raja montagui	99
AG07	Retailer2	Greater Manchester	UK	14.11.12	639	AG07_F2	Raja microcellata	100		Raja microcellata	100
AG09	Retailer3	Greater Manchester	UK	14.11.12	641	AG09_F2	Raja montagui	100		Raja montagui	99
TD09*	Retailer3	Greater Manchester	UK	26.10.12	644	TD09_F2	Raja clavata	100	Raja straeleni 98.87	Raja clavata	99	Raja maderensis 99%
AG11	Retailer4	Greater Manchester	UK	16.11.12	644	AG11_FishF2	Raja microocellata	100		Raja microocellata	100
TD11	Retailer4	Greater Manchester	UK	26.10.12	640	TD11_F2	Leucoraja fullonica	100		No hits <2% divergence		closest; Leucoraja wallacei 95%
SH10	Retailer5	Greater Manchester	UK	14.11.12	643	SH10_FishF2	Raja microocellata	100		Raja microocellata	100
MAG30	Retailer15	Greater Manchester	UK	29.01.13	643	MAG30_F2	Raja brachyura	100		Raja brachyura	100
MAG31*	Retailer16	Greater Manchester	UK	01.02.13	637	MAG31_F2	Raja clavata	100	Raja straeleni 98.86	Raja clavata	99
TD21*	Retailer7	Greater Manchester	UK	13.11.12	641	TG21_FishF2	Raja clavata	99.67	Raja straeleni 98.36	Raja clavata	99	Raja maderensis 99%
TD13	Retailer6	Liverpool	UK	27.10.12	639	TG13_FishF2	Raja brachyura	100		Raja brachyura	100
CAG02	Retailer8	Cardiff	UK	21.01.13	630	CAG02_F2	leucoraja naevus	100		Leucoraja naevus	99
CAG03	Retailer9	Cardiff	UK	22.01.13	637	CAG03_F2	Raja montagui	100		Raja montagui	99
CAG06*	Retailer10	Cardiff	UK	22.01.13	641	CAG06_F2	Raja clavata	100	Raja straeleni 98.87	Raja clavata	99	Raja maderensis 99%
CAG07	Retailer11	Cardiff	UK	22.01.13	629	CAG07_F2	Raja brachyura	100		Raja brachyura	99
CAG08*	Retailer12	Cardiff	UK	24.01.13	638	CAG08_F2	Raja clavata	100	Raja straeleni 98.86	Raja clavata	99	Raja maderensis 99%
CAG09	Retailer13	Cardiff	UK	24.01.13	641	CAG09_F2	leucoraja naevus	100		Leucoraja naevus	98
CAG10	Retailer14	Cardiff	UK	24.01.13	629	CAG10_F2	leucoraja naevus	100		Leucoraja naevus	99
CAG12	Retailer14	Cardiff	UK	25.01.14	638	CAG12_F2	Raja montagui	100		Raja montagui	99
CAG14	Retailer10	Cardiff	UK	25.01.14	638	CAG14_F2	Raja montagui	100		Raja montagui	99
PAG33*	Retailer17	Plymouth	UK	28.02.13	635	PAG33_F2	Raja montagui	100	Raja polystigma 98.22	Raja montagui	100
PAG34	Retailer18	Plymouth	UK	28.02.13	637	PAG34_F2	Raja montagui	100		Raja Montagui	99
PAG35	Retailer19	Plymouth	UK	28.02.13	643	PAG35_F2	leucoraja naevus	100		Leucoraja naevus	99
PAG36	Retailer20	Totnes	UK	01.03.13	638	PAG36_F2	leucoraja naevus	100		Leucoraja naevus	99
PAG37	Retailer21	Plymouth	UK	01.03.13	634	PAG37_F2	Raja montagui	100		Raja montagui	99
PAG38*	Retailer22	Plymouth	UK	01.03.13	631	PAG38_F2	Raja microocellata	100	Raja polystigma 98.22	Raja microocellata	99
PAG39	Retailer23	Plymouth	UK	01.03.13	638	PAG39_F2	Raja brachyura	99.84		Raja brachyura	99
PAG40	Retailer24	Plymouth	UK	02.03.13	632	PAG40_F2	leucoraja naevus	100		Leucoraja naevus	99
PAG41	Retailer25	Newton Abbot	UK	02.03.13	640	PAG41_F2	leucoraja naevus	100		Leucoraja naevus	99
PAG42	Retailer26	Exeter	UK	02.03.13	640	PAG42_F2	leucoraja naevus	100		Leucoraja naevus	98
PAG43	Retailer27	Bideford	UK	22.10.12	639	PAG43_F2	Raja brachyura	99.84		Raja brachyura	99
SHG01	Retailer28	Glasgow	UK	14.01.13	638	SHG01_F2	Raja montagui	100		Raja montagui	99
SHG04	Retailer28	Glasgow	UK	16.01.13	633	SHG04_F2	Raja brachyura	100		Raja brachyura	99
SHG05	Retailer28	Glasgow	UK	16.01.13	645	SHG05_F2	Raja montagui	100		Raja montagui	99	Leucoraja wallacei 98%
SHG06	Retailer28	Glasgow	UK	16.01.13	639	SHG06_F2	leucoraja naevus	100		Leucoraja naevus	99	Leucoraja wallacei 98%
SHG13	Retailer28	Glasgow	UK	18.01.13	642	SHG13_F2	leucoraja naevus	100		Leucoraja naevus	99	Leucoraja wallacei 98%
SHG14	Retailer28	Glasgow	UK	18.01.13	639	SHG14_F2	Raja montagui	100		Raja montagui	99
SHG15	Retailer28	Glasgow	UK	18.01.13	646	SHG15_F2	Raja montagui	100		Raja montagui	99
SHG08	Retailer29	Glasgow	UK	17.01.13	642	SHG08_F2	leucoraja naevus	100		Leucoraja naevus	99	Leucoraja wallacei 98%
SHG12	Retailer30	Glasgow	UK	18.01.13	638	SHG12_F2	Raja montagui	100		Raja montagui	99
O2A	Retailer31	Dublin	ROI	16.10.10	626	RAY-J5	Raja Brachyura	100		Raja brachyura	98
O3A	Retailer32	Dublin	ROI	02.10.10	616	RAY-J1	Raja Montagui	100		Raja montagui	98
O4A	Retailer33	Dublin	ROI	02.10.10	580	RAY-J3	Raja Brachyura	99		Raja brachyura	98
O5A	Retailer34	Dublin	ROI	02.10.10	621	RAY-J2	Leucoraja naevus	100		Leucoraja naevus	98
O6A	Retailer35	Dublin	ROI	16.10.10	573	RAY-J6	Raja Brachyura	100		Raja brachyura	98
O7A*	Retailer36	Dublin	ROI	02.10.10	529	RAY-J4	Raja Clavata	100		Raja clavata	98	Raja maderensis 99%
O8A	Retailer37	Dublin	ROI	16.10.10	628	RAY-J7	Raja Brachyura	99		Raja brachyura	98
O9AI*	Retailer38	Dublin	ROI	05.10.10	499	RAY-J13	Leucoraja naevus	100		Leucoraja naevus	98	Leucoraja wallacei 98%
O10A	Retailer39	Dublin	ROI	05.10.10	568	RAY-J25	Raja Montagui	100		Raja montagui	98
O1B	Retailer40	Dublin	ROI	30.10.10	594	RAY-J20	Raja Brachyura	99		Raja brachyura	98
O2B	Retailer41	Dublin	ROI	20.10.10	589	RAY-J36	Raja Brachyura	100		Raja brachyura	98
O3B	Retailer42	Dublin	ROI	18.10.10	608	RAY-J9	Raja Brachyura	99		Raja brachyura	98
O4B	Retailer43	Dublin	ROI	20.10.10	594	RAY-J11	Raja Brachyura	100		Raja brachyura	98
O5B	Retailer44	Dublin	ROI	30.10.10	609	RAY-J19	Raja Brachyura	99		Raja brachyura	98
O6B	Retailer45	Dublin	ROI	05.10.10	623	RAY-J33	Raja Brachyura	99		Raja brachyura	98
O7B*	Retailer46	Dublin	ROI	05.10.10	532	RAY-J21	Raja Clavata	100		Raja clavata	100	Raja maderensis 99%
O9B	Retailer47	Dublin	ROI	20.10.10	604	RAY-J10	Raja Brachyura	99		Raja brachyura	98
O3C	Retailer32	Dublin	ROI	27.10.10	530	RAY-J17	Raja Brachyura	100		Raja brachyura	98
O6C	Retailer35	Dublin	ROI	02.11.10	611	RAY-J22	Raja Montagui	100		Raja montagui	98
O7C	Retailer36	Dublin	ROI	27.10.10	521	RAY-J18	Raja Montagui	100		Raja montagui	98
O10C	Retailer39	Dublin	ROI	03.11.10	625	RAY-J34	Raja Montagui	100		Raja montagui	98
O1D	Retailer40	Dublin	ROI	12.11.10	541	RAY-J31	Raja Brachyura	100		Raja brachyura	98
O7D*	Retailer46	Dublin	ROI	01.11.10	510	RAY-J32	Raja Clavata	99		Raja clavata	98	Raja maderensis 98%
O9D	Retailer47	Dublin	ROI	01.11.10	607	RAY-J29	Raja Brachyura	99		Raja brachyura	98
J1A*	Retailer48	Dublin	ROI	30.01.10	631	RAY1A	Raja Clavata	100	Raja strealeni 98.85%	R.clavata	99	Raja maderensis 99%
J2A*	Retailer31	Dublin	ROI	30.01.10	584	RAY2A	Leucoraja naevus	100		L. naevus	99	Leucoraja wallacei 98%
J3A*	Retailer32	Dublin	ROI	30.01.10	627	RAY3A	Raja Clavata	100	Raja strealeni 98.84%	R.clavata	99	Raja maderensis 99%
J4A	Retailer33	Dublin	ROI	30.01.10	627	RAY4A	Raja Montagui	100		R. montagui	99
J5A*	Retailer34	Dublin	ROI	30.01.10	628	RAY5A	Raja Clavata	100	Raja strealeni 98.84%	R.clavata	99	Raja maderensis 99%
J6A	Retailer35	Dublin	ROI	06.02.10	631	RAY6A	Raja Montagui	100		R. montagui	99
J7A*	Retailer36	Dublin	ROI	06.02.10	628	RAY7A	Raja Clavata	100	Raja strealeni 98.84%	R.clavata	99	Raja maderensis 99%
J8A	Retailer37	Dublin	ROI	06.02.10	624	RAY8A	Raja Montagui	100		R. montagui	99
J9A	Retailer38	Dublin	ROI	06.02.10	621	RAY9A	Raja Montagui	100		R. montagui	99
J10A*	Retailer39	Dublin	ROI	06.02.10	617	RAY10A	Raja Clavata	100	Raja strealeni 98.82%	R.clavata	99	Raja maderensis 99%
J1B	Retailer40	Dublin	ROI	30.01.10	622	RAY1B	Raja brachyura (n=2)	99		R. brachyura	100
J2B	Retailer41	Dublin	ROI	31.01.10	620	RAY2B	Raja brachyura (n=2)	100		R. brachyura	99
J3B	Retailer42	Dublin	ROI	31.01.10	622	RAY3B	Raja brachyura (n=2)	100		R. brachyura	99
J4B	Retailer43	Dublin	ROI	31.01.10	631	RAY4B	Raja brachyura (n=2)	100		R. brachyura	99
J5B	Retailer44	Dublin	ROI	31.01.10	631	RAY5B	Raja brachyura (n=2)	100		R. brachyura	100
J6B	Retailer45	Dublin	ROI	31.01.10	631	RAY6B	Raja microocellata	100		R. microocellata	100
J7B	Retailer46	Dublin	ROI	07.02.10	627	RAY7B	Raja Montagui	100		R. montagui	99
J8B	Retailer49	Dublin	ROI	07.02.10	628	RAY8B	Raja brachyura (n=2)	100		R. brachyura	100
J9B*	Retailer47	Dublin	ROI	07.02.10	631	RAY9B	Raja Clavata	100	Raja strealeni 98.85%	R.clavata	99	Raja maderensis 99%
J1C	Retailer48	Dublin	ROI	19.02.10	635	RAY1C	Raja brachyura (n=2)	100		R. brachyura	99
J2C	Retailer31	Dublin	ROI	19.02.10	630	RAY2C	Raja brachyura (n=2)	100		R. brachyura	99
J4C	Retailer33	Dublin	ROI	19.02.10	632	RAY4C	Raja Montagui	100		R. montagui	99
J5C	Retailer34	Dublin	ROI	20.02.10	632	RAY5C	Raja Montagui	100		R. montagui	99
J6C	Retailer35	Dublin	ROI	20.02.10	634	RAY6C	Raja Montagui	100		R. montagui	99
J7C	Retailer36	Dublin	ROI	20.02.10	634	RAY7C	Raja Montagui	100		R. montagui	99
J8C	Retailer37	Dublin	ROI	20.02.10	634	RAY8C	Raja Montagui	100		R. montagui	99
J9C	Retailer38	Dublin	ROI	23.02.10	495	RAY9C	Raja brachyura (n=2)	100		R. brachyura	100
J1D*	Retailer40	Dublin	ROI	21.01.10	503	RAY1D	Raja Clavata	100	Raja strealeni 98.59%	R.clavata	99	Raja maderensis 99%
J2D*	Retailer41	Dublin	ROI	21.01.10	631	RAY2D	Raja Clavata	100	Raja strealeni 98.85%	R.clavata	99	Raja maderensis 99%
J3D	Retailer42	Dublin	ROI	21.01.10	631	RAY3D	Raja brachyura (n=2)	100		R. brachyura	100
J4D	Retailer43	Dublin	ROI	21.01.10	632	RAY4D	Raja Brachyura	100		R. brachyura	100
J5D*	Retailer44	Dublin	ROI	21.01.10	628	RAY5D	Raja Clavata	100	Raja strealeni 98.84%	R.clavata	99	Raja maderensis 99%
J6D*	Retailer45	Dublin	ROI	21.01.10	628	RAY6D	Raja Clavata	100	Raja strealeni 98.84%	R.clavata	99	Raja maderensis 99%
J7D*	Retailer46	Dublin	ROI	21.02.10	633	RAY7D	Raja Clavata	100	Raja strealeni 98.85%	R.clavata	99	Raja maderensis 99%
* In these samples the database searches also yielded matches to a second, closely related, species e.g. for R. clavata high homology was found to Raja maderensis or Raja staeleni. In all cases, these secondary matches showed lower or equal homology to those species detailed above. In addition they all derived from species not found around the British Iles and were therefore deemed as unlikely to…
(n = 2 means that two independent tissue samples were collected from a wing and sequenced in isolation)
